## THE EFFECTS OF SOFTWATER ACCLIMATION ON RESPIRATORY GAS TRANSFER IN THE RAINBOW TROUT *ONCORHYNCHUS MYKISS*

ANNA MARIA GRECO<sup>1</sup>, KATHLEEN M. GILMOUR<sup>2</sup>, JAMES C. FENWICK<sup>1</sup> AND STEVE F. PERRY<sup>1,\*</sup>

<sup>1</sup>Department of Biology, University of Ottawa, 30 Marie Curie, Ottawa, Ontario, Canada K1N 6N5 and  
<sup>2</sup>McMaster University, Department of Biology, 1280 Main Street West, Hamilton, Ontario, Canada L8S 4K1

Accepted 4 August 1995

### Summary

Gill O<sub>2</sub> uptake, CO<sub>2</sub> excretion, ventilation and blood respiratory/acid–base variables were evaluated in control and softwater-acclimated trout (*Oncorhynchus mykiss*) to test the hypothesis that gill chloride cell (CC) proliferation, elicited by 2 weeks of softwater exposure, impairs the diffusion of respiratory gases across the gill. The proliferation of CCs in softwater fish was verified using light microscopy, and its impact on respiratory gas transfer was assessed *in vivo* by continuous monitoring of arterial blood P<sub>O<sub>2</sub></sub> (P<sub>aO<sub>2</sub></sub>), P<sub>CO<sub>2</sub></sub> (P<sub>aCO<sub>2</sub></sub>) and pH (pHa) using an extracorporeal blood circulation under conditions of normoxia and graded hypoxia [water P<sub>O<sub>2</sub></sub> (P<sub>wO<sub>2</sub></sub>) was lowered from 20.0 kPa to 5.3 kPa within 20 min].

During normoxia, ventilation frequency was significantly higher in the softwater trout (78±4 *versus* 57±4 breaths min<sup>-1</sup>; mean ± S.E.M.), while ventilation amplitude was similar in both groups (1.0–1.1 cm opercular displacement). P<sub>aCO<sub>2</sub></sub> and plasma HCO<sub>3</sub><sup>-</sup> concentration were significantly lower in the softwater fish and the blood acid–base status was characterized by a mixed respiratory alkalosis and metabolic acidosis such that blood pH was not statistically different between the two groups. CO<sub>2</sub> excretion (2.5–2.8 mmol kg<sup>-1</sup> h<sup>-1</sup>) and O<sub>2</sub> uptake rates (2.3–5.1 mmol kg<sup>-1</sup> h<sup>-1</sup>), as measured during normoxia, were unaffected by acclimation to soft water.

During hypoxia, ventilation frequency and amplitude increased in the control trout, whereas only ventilation amplitude increased in the softwater-acclimated fish. The rate of P<sub>aO<sub>2</sub></sub> reduction during hypoxia was significantly greater in the softwater fish (0.84±0.06 *versus* 0.65±0.06 kPa P<sub>aO<sub>2</sub></sub> kPa<sup>-1</sup> P<sub>wO<sub>2</sub></sub>) and, at the most severe level of hypoxia (P<sub>wO<sub>2</sub></sub>=5.3 kPa), P<sub>aO<sub>2</sub></sub> was significantly lower in the softwater fish. The rate of P<sub>aCO<sub>2</sub></sub> reduction (caused by hyperventilation) was significantly lower in the softwater-acclimated fish (0.002±0.001 *versus* 0.005±0.001 kPa P<sub>aCO<sub>2</sub></sub> kPa<sup>-1</sup> P<sub>wO<sub>2</sub></sub>; mean ± S.E.M.; P<0.06) and, indeed, was not statistically different from zero. Blood pH did not change significantly during hypoxia in either group but, through much of the hypoxic period (7–15 kPa P<sub>wO<sub>2</sub></sub>), pHa was statistically lower in the softwater-acclimated fish.

These results demonstrate that exposure of trout to soft water for 2 weeks is associated with proliferation of lamellar CCs and impaired branchial gas transfer. Hyperventilation was identified as a compensatory physiological adjustment.

Key words: *Oncorhynchus mykiss*, rainbow trout, gill, chloride cell, hypoxia, soft water, gas transfer, ventilation.

### Introduction

Acclimation of teleost fish to soft water elicits an array of adaptive physiological responses aimed at maintaining ionic homeostasis in an ion-poor environment (McDonald and Rogano, 1986; see reviews by Laurent and Perry, 1991; Perry and Laurent, 1993). One of the best documented responses is the proliferation of chloride cells (CCs) on the lamellar surfaces of the gill (Laurent *et al.* 1985, 1994; Perry and Wood, 1985; Avella *et al.* 1987; Leino *et al.* 1987; Spry and Wood, 1988; Perry and Laurent, 1989; Laurent and Hebibi, 1989). Because of the presumed role of the CC in transbranchial Ca<sup>2+</sup>

uptake (Perry and Flik, 1988; Marshall *et al.* 1992; McCormick *et al.* 1992; Perry *et al.* 1992a) and NaCl uptake (Perry and Laurent, 1989; Laurent and Perry, 1990; Perry *et al.* 1992b), this proliferation of CCs in soft water is thought to be a strategy to optimize gill ion-transport capacity (Perry and Wood, 1985; Perry and Laurent, 1989).

Recent studies have demonstrated that branchial proliferation of the large spherical CCs, caused either by exogenous cortisol/growth hormone treatment (Bindon *et al.* 1994a) or by softwater exposure (A. M. Greco, J. C. Fenwick

\*Author for correspondence.

and S. F. Perry, in preparation), causes a marked thickening of the lamellar blood-to-water diffusion distance. In the absence of compensatory adjustment(s), such morphological changes would be expected to impede the diffusion of respiratory gases across the gill (Randall and Daxboeck, 1984). Indeed, Bindon *et al.* (1994b) demonstrated experimentally that the thickening of the diffusion barrier caused by the hormone treatment was associated with an elevation of arterial blood  $P_{CO_2}$  ( $Pa_{CO_2}$ ) and a reduction of  $Pa_{O_2}$  during severe hypoxia. A potential limitation in the study of Bindon *et al.* (1994b) was the possibility of non-specific metabolic effects associated with the use of pharmacological (i.e. non-physiological) levels of hormones to elicit CC proliferation.

The goal of the present study was to evaluate the consequences of naturally induced CC proliferation on respiratory gas transfer. This was achieved by exposing trout to soft water for a period of 2 weeks, after which the lamellar blood-to-water diffusion distance is known to be doubled (A. M. Greco, J. C. Fenwick and S. F. Perry, in preparation). Respiratory function along with ventilation parameters were investigated using an extracorporeal blood circulation set-up under conditions of normoxia and graded hypoxia.

## Materials and methods

### Experimental animals

Rainbow trout [*Oncorhynchus mykiss* (Walbaum)] of both sexes and weighing between 574 and 964 g (mean mass  $727 \pm 30$  g, experimental  $N=15$ ; mean  $\pm$  S.E.M.) were purchased from Linwood Acres Trout Farm (Campbellcroft, Ontario, Canada) and transferred to the fish holding facility of the University of Ottawa. Fish were kept indoors in large tanks furnished with flowing, dechlorinated and aerated City of Ottawa tapwater (see Table 1 for water chemistry). The photoperiod was kept constant at 12 h:12 h light:dark. Fish were fed to satiation daily with a dried commercial trout diet (Purina Trout Chow) and were acclimated to laboratory conditions for at least 4 weeks before any experiments were performed.

### Acclimation protocol

Fish were divided between two large fibreglass tanks (Living Stream; Toledo, OH, USA). The first tank (control group) was supplied with running dechlorinated tapwater. The second tank (softwater-acclimated group) was supplied with dechlorinated tapwater diluted with running reverse osmosis (RO) water (see Table 1 for water chemistry). Total water flow rates to the tanks were adjusted to  $51 \text{ min}^{-1}$ . The experimental group of fish was exposed to the softwater condition by a gradual increase in the proportion of RO water over a period of 3 days until the final conditions were met. The third day was recorded as day 1 of softwater exposure. Fish were acclimated to softwater conditions for 2 weeks. Softwater fish were fed to satiation daily, the quantity of food consumed was recorded, and the control fish were fed accordingly (average = 1 % body mass  $\text{day}^{-1}$ ).

Table 1. Water chemistry variables for the control (City of Ottawa tapwater) and softwater (artificial soft water) conditions that were utilized for trout acclimation

|                                      | City of Ottawa<br>dechlorinated tapwater | Artificial<br>soft water          |
|--------------------------------------|------------------------------------------|-----------------------------------|
| $[Ca^{2+}]$ ( $\text{mmol l}^{-1}$ ) | $0.37 \pm 0.01$<br>( $N=39$ )            | $0.04 \pm 0.01^*$<br>( $N=40$ )   |
| $[Na^+]$ ( $\text{mmol l}^{-1}$ )    | $0.12 \pm 0.002$<br>( $N=39$ )           | $0.05 \pm 0.002^*$<br>( $N=40$ )  |
| $[K^+]$ ( $\text{mmol l}^{-1}$ )     | $0.019 \pm 0.001$<br>( $N=39$ )          | $0.009 \pm 0.001^*$<br>( $N=40$ ) |
| $[Cl^-]$ ( $\text{mmol l}^{-1}$ )    | $0.15 \pm 0.001$<br>( $N=39$ )           | $0.04 \pm 0.002^*$<br>( $N=40$ )  |
| $P_{wO_2}$ (kPa)                     | $20.2 \pm 0.3$<br>( $N=7$ )              | $20.2 \pm 0.2$<br>( $N=8$ )       |
| $[HCO_3^-]$ ( $\text{mmol l}^{-1}$ ) | $0.44 \pm 0.01$<br>( $N=7$ )             | $0.16 \pm 0.02^*$<br>( $N=8$ )    |
| Temperature ( $^{\circ}\text{C}$ )   | 10.5                                     | 11.5                              |
| pH                                   | 6.8                                      | 6.6                               |

Values are means  $\pm$  1 S.E.M.  
\*indicates a significant difference from the control value using two-sample *t*-test,  $P < 0.05$ .

### Surgical techniques

After acclimation for 2 weeks, trout were anaesthetized in a solution of MS-222 ( $0.125 \text{ g l}^{-1}$ ) neutralized with  $\text{NaHCO}_3$  ( $0.25 \text{ g l}^{-1}$ ) and placed onto a surgery table. The gills were irrigated continuously throughout the operation with oxygenated anaesthetic solution. The dorsal aorta was cannulated using flexible polyethylene tubing (Clay-Adams PE 50, i.d. 0.580 mm, o.d. 0.965 mm) as described by Soivio *et al.* (1975). The fish was moved onto its left side and an incision was made on the right-hand flank, parallel and 1 cm posterior to the outer edge of the operculum. This allowed access to the coeliac artery, which was cannulated (PE 50) in two directions (orthograde and retrograde) (Thomas and LeRuz, 1982). The cannulae would later form an extracorporeal loop through which arterial blood would be pumped, enabling the measurement of blood respiratory and acid-base variables. After suturing the wound, the cannulae were flushed with heparinized saline ( $50 \text{ i.u. ml}^{-1}$  ammonium heparin) to prevent blood from clotting. Small ( $1 \text{ cm}^2$ ) brass plate electrodes were stitched to the epithelium of each operculum to allow the measurement of ventilation amplitude *via* an impedance converter.

The fish were revived after surgery by irrigating the gills with fresh oxygenated water and were then introduced into an experimental chamber furnished with flowing and aerated water. Fish were left to recover for 24 h prior to experimentation; food was withheld for this period.

### Experimental arrangement

Fish were held in black Perspex boxes with clear windows

used for observing the interior of the box; windows were normally covered to avoid disturbing the fish. The cannulae and electrode wires were passed through a slit in the chamber lid. The dorsal aortic cannula was connected to a pressure transducer (Bell and Howell 4-327-1) which, in turn, was connected to a recording physiograph. Blood pressure was monitored during the experiment to establish the patency of the extracorporeal preparation. Persistent reduction in blood pressure indicates blood loss and in such cases experiments were terminated. Opercular displacement was monitored using an impedance converter and amplifier. Ventilation frequency was measured periodically by visually counting buccal movements.

The two coeliac cannulae formed a loop which was connected in series with thermostatted (10–12 °C) cells containing  $P_{O_2}$  (Radiometer model E-5046),  $P_{CO_2}$  (Radiometer model E-5036) and pH (Metrohm combination electrode) electrodes, which were attached to a Radiometer PHM-73. This external loop tubing was flushed with heparinized saline (540 i.u. ml<sup>-1</sup>) before starting the blood flow. Blood was removed from the 'arterial' (retrograde) cannula at a constant rate (1.2 ml min<sup>-1</sup>) and passed through the cells by means of a small peristaltic pump before being returned to the fish through the 'venous' (orthograde) cannula. The total volume of blood in the extracorporeal loop was less than 4% of the total blood volume of the fish. Water  $P_{O_2}$  ( $P_{wO_2}$ ) in the experimental chamber was measured by means of another Radiometer  $P_{O_2}$  electrode connected to a PHM-72 meter.

Calibration of the  $P_{CO_2}$  and  $P_{O_2}$  electrodes was carried out by equilibrating water with gas of the appropriate  $P_{CO_2}$  and  $P_{O_2}$  using a Wöstoff pump (M301 A/F) and pumping the water across the electrodes with the peristaltic pump. pH electrode calibration was achieved with buffer solutions.

Oxygen consumption ( $\dot{M}_{O_2}$ ) and CO<sub>2</sub> excretion ( $\dot{M}_{CO_2}$ ) were measured using closed system respirometry techniques (Holeton and Randall, 1967). Water flow to the fish box was halted and  $P_{wO_2}$  was monitored continuously until it had decreased by about 4 kPa. After each 1 kPa decrease in  $P_{wO_2}$ , water samples (1.5 ml) were taken from an area close to the mouth of the fish *via* the output of the  $P_{wO_2}$  electrode. Changes in  $P_{wO_2}$ , mass of the fish and volume of the box, along with constants from Boutilier *et al.* (1984) were used for calculating  $\dot{M}_{O_2}$ . Total CO<sub>2</sub> was measured (Cameron Capnicon, model 5) on the withdrawn water samples and used to calculate  $\dot{M}_{CO_2}$ .

The extracorporeal arrangement allowed the arterial oxygen partial pressure ( $P_{aO_2}$ ), the arterial carbon dioxide partial pressure ( $P_{aCO_2}$ ), the water oxygen partial pressure ( $P_{wO_2}$ ) and the arterial pH (pHa) to be monitored continuously during the experiment. Mean values for each parameter were captured and stored every 5 s. All measuring devices produced analog outputs which were transformed into digital outputs with the aid of an analog–digital interface (Data Translation Incorporated). These output values were transmitted to a microcomputer and the output was recorded using a customized data acquisition software (AD-DATA; P. Thoren, Göteborg, Sweden).

#### Experimental protocol

The protocol consisted of two separate stages, normoxia and hypoxia. The pumping of the blood to the external loop was started during normoxia and the variables were allowed to stabilize for 20 min. The closed system respirometry was then performed and, following a recovery period with  $P_{wO_2}$  levels at normoxia (20 kPa), a pre-hypoxia blood sample of 0.5 ml was taken for the measurement of haematocrit (Hct), haemoglobin concentration ([Hb]),  $Ca_{O_2}$  and plasma ion concentrations.

During the second stage, fish were subjected to hypoxia by bubbling compressed N<sub>2</sub> through a water equilibration column which supplied the experimental holding box. The flow rate of N<sub>2</sub> was carefully monitored to produce a linear decrease in  $P_{wO_2}$ . The hypoxic period was imposed over a 20 min period with  $P_{wO_2}$  being reduced at an approximate rate of 0.8 kPa min<sup>-1</sup> to an end value of 5.3 kPa.

#### Morphology

CC proliferation was confirmed using light microscopy. At the end of the experiment, each fish was returned to normoxia. Fish were killed using a lethal dose of anaesthetic (0.5 g l<sup>-1</sup> MS-222), and several pairs of filaments still attached at the septum were removed from the left second gill arch. The tissue was immediately immersed in Champ Maillet's fluid, a mixture of 1.2% ZnI<sub>2</sub> and 0.2% OsO<sub>4</sub>, as described by Garcia-Romeu and Masoni (1970), and left at room temperature for 30 h. This fixative/stain causes a reduction of osmic acid to osmium, which blackens the phospholipids. CCs have an intricate plasma membrane with many invaginations and thus stain strongly. After rinsing in distilled water for 6 h (changed three times), the gills were dehydrated in an ethanol series and embedded in paraffin wax. Sections were cut (8 µm thick) and placed onto gelatin-coated glass slides. Paraffin sections were deparaffinized in three changes of xylene for 3 min each. Sections were then mounted in permount (BDH chemicals) before being viewed using a light microscope (40× objective; Leitz Wetzlar – Dialux 20 EB). Photographs were taken using an attached camera (Wild Heerbrugg Mps 45 Photoautomat).

#### Water and blood analysis

Plasma total CO<sub>2</sub> and bicarbonate concentration ([HCO<sub>3</sub><sup>-</sup>]) were calculated using the Henderson–Hasselbalch equation, based on the  $P_{aCO_2}$  and pHa values measured with the extracorporeal set-up and constants from Boutilier *et al.* (1984). Haemoglobin content ([Hb]) was determined spectrophotometrically using a commercial kit (Sigma Chemical Company). Total oxygen content ([O<sub>2</sub>]) was determined on 20 µl samples according to the method of Tucker (1967). Haematocrit was measured in duplicate using microcapillary tubes centrifuged at 10 000 g for 10 min. The remaining blood was centrifuged at 10 000 g for 30 s and the plasma was frozen and stored at -80 °C for later ion analysis. Water and plasma [Na<sup>+</sup>], [Ca<sup>2+</sup>] and [K<sup>+</sup>] were determined by flame emission spectrophotometry (Varian, model Spectra AA

250 Plus).  $[Cl^-]$  was determined by a mercuric thiocyanate spectrophotometric assay method (Zall *et al.* 1956). Acclimation water pH was measured using a pH meter (Ionalyzer, model 407A, Orion Research).

#### Data and statistical analysis

Data are presented as means  $\pm 1$  standard error of the mean (S.E.M.). For data obtained from the extracorporeal experiments, statistical analyses were performed on the mean data displayed at intervals of 1.3 kPa  $PwO_2$  using one-way analysis of variance (ANOVA). At each point (i.e. at each 1.3 kPa change in  $PwO_2$ ), a two-sample *t*-test was performed to compare softwater with control fish. Also, linear regressions were performed and tested with *t*-tests to determine whether rates of change of blood and ventilation parameters with  $PwO_2$  were significantly different in the control and softwater fish. Differences in other measured parameters (e.g. [Hb],  $[Ca^{2+}]$ , etc.) were analyzed using two-sample *t*-tests. Except when stated otherwise, the fiducial limit of significance was 5%.

## Results

### Gill morphology

Representative light micrographs of control (Fig. 1A) and softwater-exposed (Fig. 1B) rainbow trout gills illustrate the general morphological appearance of the filaments and lamellae from the two groups. The black-stained CCs were clearly protruding from and proliferated over the entire surface of the gill epithelium of the softwater fish. CCs were smaller and less numerous on the control fish gills.

### Plasma ion levels and respiratory variables during normoxia

After 2 weeks, plasma  $[Cl^-]$  was significantly lower in the softwater-acclimated fish, while  $[Ca^{2+}]$ ,  $[K^+]$ ,  $[Na^+]$  and osmolality were unaffected (Table 2). Table 3 shows the blood and gas transfer parameters measured immediately before the start of the hypoxic period. Ventilation parameters were measured before determining rates of  $O_2$  uptake and  $CO_2$  excretion. Mean red blood cell haemoglobin concentration (MCHC) was significantly lower in softwater trout compared with controls, indicating cell swelling.  $[HCO_3^-]$  in the

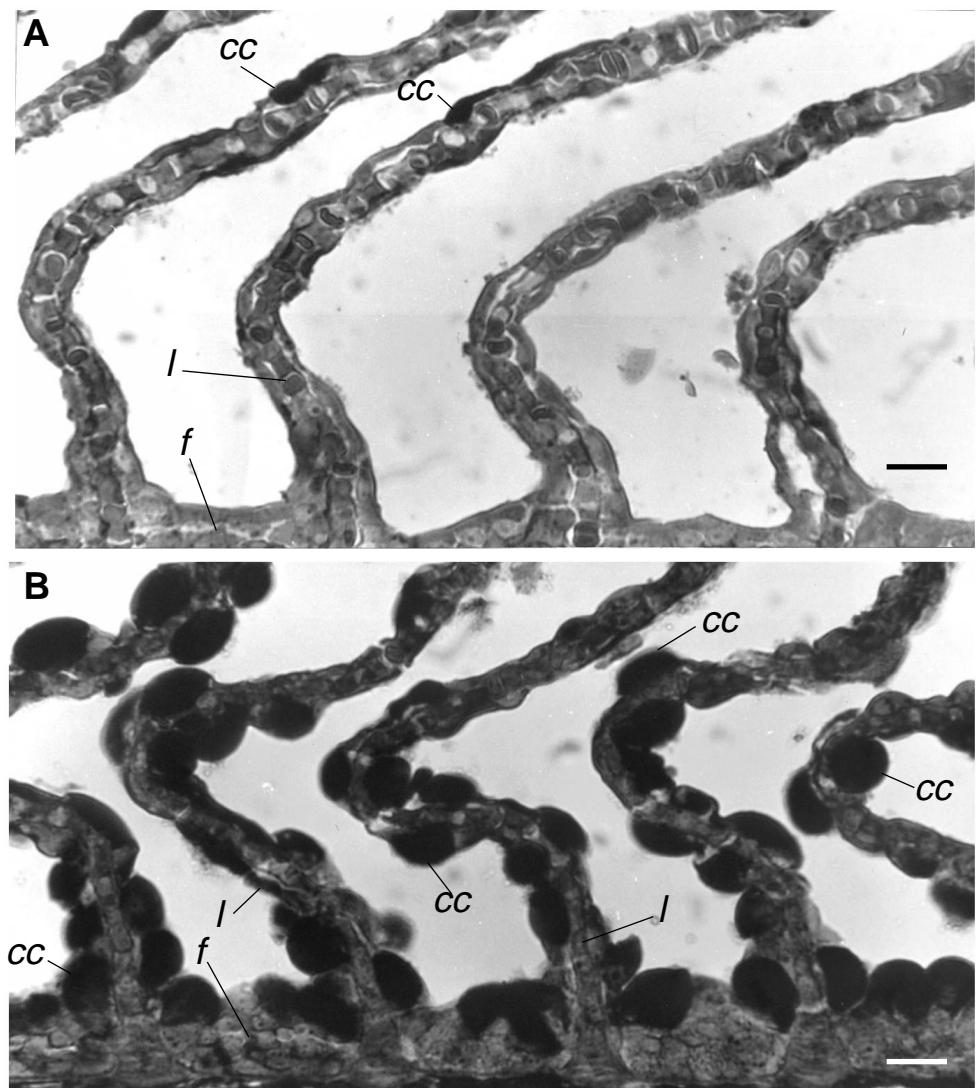

Fig. 1. Representative light micrographs of trout gills showing filament and lamellae from (A) control fish and (B) fish exposed to softwater conditions for 2 weeks. Chloride cells (CCs), which are stained black, have proliferated over the entire surface of the gill epithelium of the softwater fish; *l*, lamellae; *f*, filament. The CCs of the control fish are smaller and far less numerous. Scale bars, 15  $\mu m$ .

Table 2. Plasma ion levels measured in control and softwater-acclimated trout

|                                             | Control trout<br>(N=7) | Softwater trout<br>(N=8) |
|---------------------------------------------|------------------------|--------------------------|
| [Ca <sup>2+</sup> ] (mmol l <sup>-1</sup> ) | 2.4±0.2                | 1.8±0.3                  |
| [Na <sup>+</sup> ] (mmol l <sup>-1</sup> )  | 141.0±4.6              | 128.4±7.7                |
| [K <sup>+</sup> ] (mmol l <sup>-1</sup> )   | 2.7±0.4                | 2.8±0.5                  |
| [Cl <sup>-</sup> ] (mmol l <sup>-1</sup> )  | 143.3±4.1              | 123.6±3.8*               |
| Osmolarity<br>(mmol kg <sup>-1</sup> )      | 288.9±1.5              | 280.8±3.8                |

Values are means ± 1 S.E.M.

\*indicates a significant difference from the control value using two-sample *t*-test, *P*<0.05.

Table 3. Blood, ventilation and gas exchange variables measured during the normoxia (pre-hypoxia) stage of the extracorporeal experiments in control and softwater-acclimated trout

|                                                               | Control trout<br>(N=7) | Softwater trout<br>(N=8) |
|---------------------------------------------------------------|------------------------|--------------------------|
| Haematocrit (%)                                               | 22.8±1.5               | 21.1±1.9                 |
| [Hb] (ml 100 ml <sup>-1</sup> )                               | 9.14±1.66              | 7.02±0.88                |
| MCHC (g ml <sup>-1</sup> )                                    | 0.40±0.03              | 0.30±0.02*               |
| [O <sub>2</sub> ] (ml 100 ml <sup>-1</sup> )                  | 10.06±0.74             | 8.96±0.84                |
| [O <sub>2</sub> ]/[Hb] (ml O <sub>2</sub> g <sup>-1</sup> Hb) | 1.08±0.11              | 1.32±0.17                |
| [HCO <sub>3</sub> <sup>-</sup> ] (mmol l <sup>-1</sup> )      | 6.71±0.51              | 4.74±0.58*               |
| Blood pressure (kPa)                                          | 3.25±0.20              | 3.28±0.48                |
| $\dot{M}O_2$ (mmol kg <sup>-1</sup> h <sup>-1</sup> )         | 2.28±0.23              | 5.10±1.80                |
| $\dot{M}CO_2$ (mmol kg <sup>-1</sup> h <sup>-1</sup> )        | 2.53±0.52              | 2.78±0.58                |
| R, $\dot{M}CO_2/\dot{M}O_2$                                   | 1.18±0.23              | 0.86±0.30                |
| Ventilation frequency<br>(min <sup>-1</sup> )                 | 57.4±3.59              | 78.1±4.43*               |
| Opercular displacement<br>(cm)                                | 1.02±0.09              | 1.12±0.18                |

Values are means ± 1 S.E.M.

\*indicates a significant difference from the control value using two-sample *t*-test, *P*<0.05.

Hb, haemoglobin; MCHC, mean cellular haemoglobin concentration.

softwater trout was significantly lower than in the controls and, together with the reduced blood pH (see Fig. 6), represented a base deficit (metabolic acid load) of approximately 3 mmol l<sup>-1</sup>. Rates of CO<sub>2</sub> excretion and O<sub>2</sub> uptake were unaffected by acclimation to soft water. The gill respiratory exchange ratio (R:  $\dot{M}CO_2/\dot{M}O_2$ ) showed large variability and was not statistically different between groups. The ventilation frequency was significantly elevated in the softwater-acclimated fish by 21 breaths min<sup>-1</sup> (36% increase) compared with the ventilation frequency of the control fish, while ventilation amplitude was not affected by softwater acclimation.

#### Graded hypoxia

During hypoxia, the control fish increased their ventilation

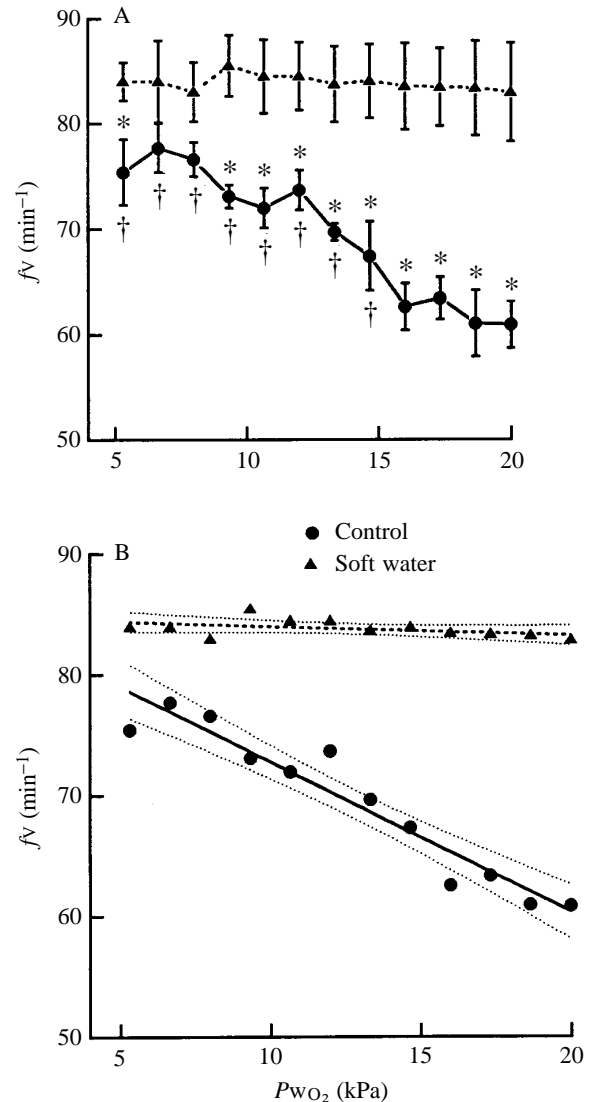

Fig. 2. (A) Effect of environmental hypoxia on ventilation frequency (*f<sub>v</sub>*) in control (solid line; *N*=7) and softwater-acclimated (dashed line; *N*=8) rainbow trout. † indicates a significant difference (*P*<0.05) in *f<sub>v</sub>* from the values measured during normoxia (at *P*<sub>wO<sub>2</sub></sub>=20 kPa). \* indicates a significant difference (*P*<0.05) between the treatment groups. Error bars represent ±1 S.E.M. (B) Regression analysis showing the mean linear relationships between *f<sub>v</sub>* and *P*<sub>wO<sub>2</sub></sub> in the control fish (slope = -1.21 ± 0.15 breaths min<sup>-1</sup> kPa<sup>-1</sup> *P*<sub>wO<sub>2</sub></sub>) and softwater-acclimated rainbow trout (slope = -0.207 ± 0.056 breaths min<sup>-1</sup> kPa<sup>-1</sup> *P*<sub>wO<sub>2</sub></sub>). There is a significant difference (*P*<0.05) between the two groups in the slopes of the lines relating ventilation frequency and *P*<sub>wO<sub>2</sub></sub>. 95% confidence limits are shown as dotted lines.

frequency significantly at *P*<sub>wO<sub>2</sub></sub> values of 14.8 kPa and below (Fig. 2A). The ventilation frequency of the softwater-acclimated trout remained constant during hypoxia, yet was considerably greater than in the control trout owing to the high initial (normoxia) values. The regression analysis (Fig. 2B) demonstrated a significant difference in the slope of the relationship between ventilation frequency and *P*<sub>wO<sub>2</sub></sub> during hypoxia between the control and softwater-acclimated trout.

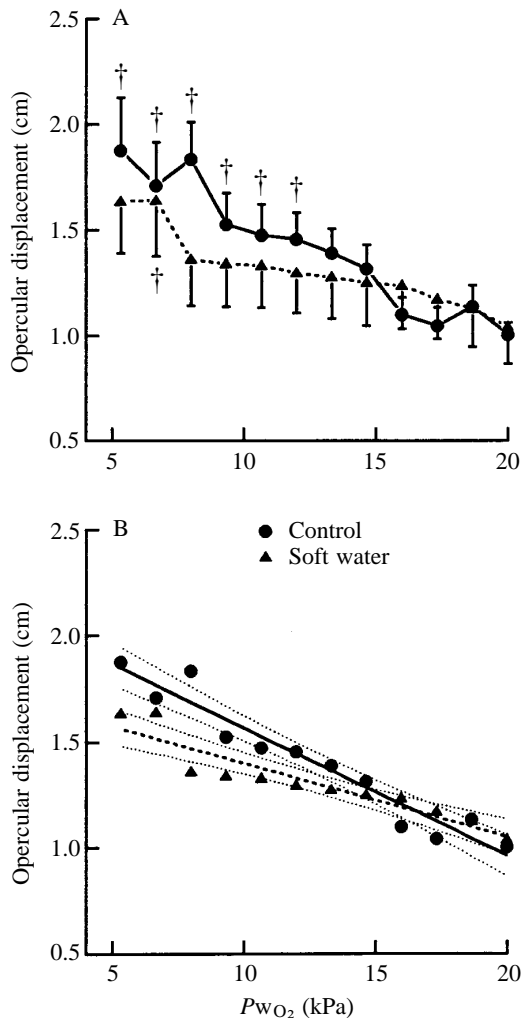

Fig. 3. (A) Effect of environmental hypoxia on mean opercular displacement in control (solid line;  $N=7$ ) and softwater-acclimated (dashed line;  $N=8$ ) rainbow trout. † indicates a significant difference ( $P < 0.05$ ) in opercular displacement from the values measured during normoxia ( $Pw_{O_2}=20$  kPa). Error bars represent 1 S.E.M. and are shown in only one direction for clarity. (B) Regression analysis showing the mean linear relationships between opercular displacement and  $Pw_{O_2}$  in the control (slope =  $-0.061 \pm 0.012$  cm kPa $^{-1}$   $Pw_{O_2}$ ) and softwater-acclimated trout (slope =  $-0.026 \pm 0.005$  cm kPa $^{-1}$   $Pw_{O_2}$ ). There is a significant difference ( $P < 0.05$ ) between the two groups in the slopes of the lines relating opercular displacement and  $Pw_{O_2}$ . 95% confidence limits are shown as dotted lines.

The effects of graded hypoxia on opercular displacement are shown in Fig. 3A. Both the control and the softwater-acclimated fish increased their opercular displacement when exposed to hypoxia, but in the case of the softwater fish this increase was not apparent until a greater level of hypoxia had been imposed (6.7 kPa). Furthermore, a linear regression analysis (Fig. 3B) revealed a significant difference in the slope of the relationship between opercular displacement and  $Pw_{O_2}$  between the two groups, with the slope for the control group being steeper than that of the softwater group.

The effects of graded hypoxia on  $Pa_{O_2}$  are shown in Fig. 4A. Both groups experienced significant decreases in  $Pa_{O_2}$  compared with normoxia values at all levels of  $Pw_{O_2} \leq 16$  kPa. The softwater-acclimated fish were able to maintain  $Pa_{O_2}$  values comparable to those in the control fish, except at the lowest  $Pw_{O_2}$  of 5.3 kPa, at which point the  $Pa_{O_2}$  of the softwater trout was significantly lower than in the controls. Fig. 4B reveals that the slope of the relationship between  $Pa_{O_2}$  and  $Pw_{O_2}$  was significantly steeper in the softwater-acclimated trout. Fig. 4C illustrates the relationship between  $Pw_{O_2}$  and the difference between  $Pw_{O_2}$  and  $Pa_{O_2}$  ( $Pw_{O_2} - Pa_{O_2}$ ), providing an estimate of  $O_2$  transfer effectiveness [effectiveness =  $(Pa_{O_2} - Pv_{O_2}) / (Pw_{O_2} - Pv_{O_2})$ ; see Cameron, 1989] during progressive hypoxia.

The absolute values of  $Pa_{CO_2}$  were similar in control and softwater-acclimated fish at all levels of hypoxia (Fig. 5A). The slope of the relationship between  $Pa_{CO_2}$  and  $Pw_{O_2}$  during hypoxia was significantly less steep ( $P < 0.06$ ) in the softwater-acclimated fish than in the control fish ( $0.002 \pm 0.001$  versus  $0.005 \pm 0.001$  kPa  $Pa_{CO_2}$  kPa $^{-1}$   $Pw_{O_2}$ ; Fig. 5B).

Blood pH did not change significantly during hypoxia in either group (Fig. 6A), but through much of the hypoxic period (7–14.8 kPa  $Pw_{O_2}$ ), pHa was statistically lower in the softwater-acclimated fish. The regression analysis (Fig. 6B) demonstrated that the slopes of the relationships between pHa and  $Pw_{O_2}$  in the two groups of fish were not different from one another during hypoxia.

## Discussion

### Gill morphology and ionic regulation in softwater-acclimated fish

In the present study, trout were maintained for 2 weeks in soft water. After this period, plasma  $Cl^-$  levels were significantly depressed and, although not significant, there was a trend towards reduced plasma levels of  $Ca^{2+}$  and  $Na^+$  (Table 2). Thus, despite the proliferation of chloride cells and the possible activation of other regulatory mechanisms (McDonald and Rogano, 1986), the ionoregulatory capability appeared to remain impaired. It is not unreasonable to suggest, however, that the plasma ion levels would have been reduced still further in the absence of chloride cell proliferation.

Regardless of its significance in ionoregulation, chloride cell proliferation is a well-established response of trout and other teleosts to soft water exposure and must markedly influence the gill blood-to-water diffusion barrier at such times. Recently A. M. Greco, J. C. Fenwick and S. F. Perry (in preparation), using fish of the same stock and almost identical acclimation conditions as in the present study, reported a twofold increase in the lamellar diffusion distance (from  $3.26 \pm 0.08$  to  $6.58 \pm 0.43$   $\mu m$ ) based on detailed analysis of transmission electron micrographs. Using a similar analytical procedure, Bindon *et al.* (1994a) observed a comparable thickening of the lamellar diffusion barrier associated with the chloride cell proliferation accompanying chronic treatment of trout with

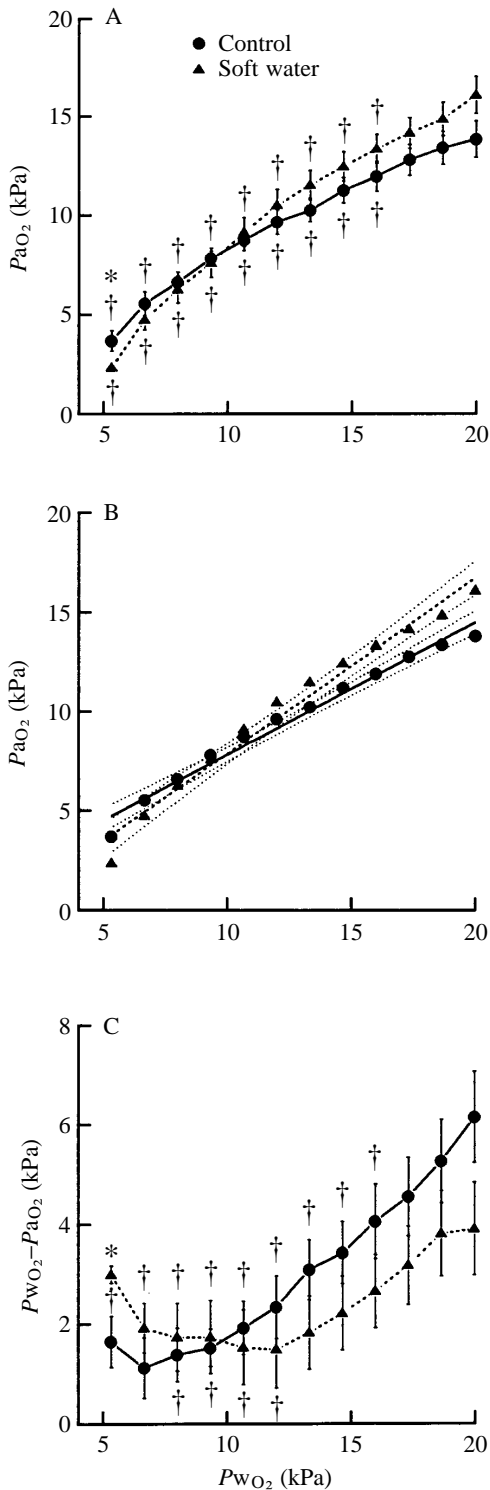

Fig. 4. (A) Effect of environmental hypoxia on arterial oxygen partial pressure ( $P_{aO_2}$ ) in control (solid line;  $N=7$ ) and softwater-acclimated rainbow trout (dashed line;  $N=8$ ). † indicates a significant difference ( $P < 0.05$ ) in  $P_{aO_2}$  from the values measured during normoxia ( $P_{wO_2}=20$  kPa). \* indicates a significant difference ( $P < 0.05$ ) between the treatment groups. Error bars represent  $\pm 1$  S.E.M. (B) Regression analysis showing the mean linear relationships between  $P_{aO_2}$  and  $P_{wO_2}$  in the control fish (slope= $0.84 \pm 0.06$  kPa  $P_{aO_2}$  kPa $^{-1}$   $P_{wO_2}$ ) and softwater-acclimated fish (slope= $0.65 \pm 0.06$  kPa  $P_{aO_2}$  kPa $^{-1}$   $P_{wO_2}$ ). There is a significant difference ( $P < 0.05$ ) between the two groups in the slopes of the lines relating  $P_{aO_2}$  and  $P_{wO_2}$ . 95% confidence limits are shown as dotted lines. (C) Effect of environmental hypoxia on the difference between  $P_{wO_2}$  and  $P_{aO_2}$  ( $P_{wO_2} - P_{aO_2}$ ). Symbols as in A.

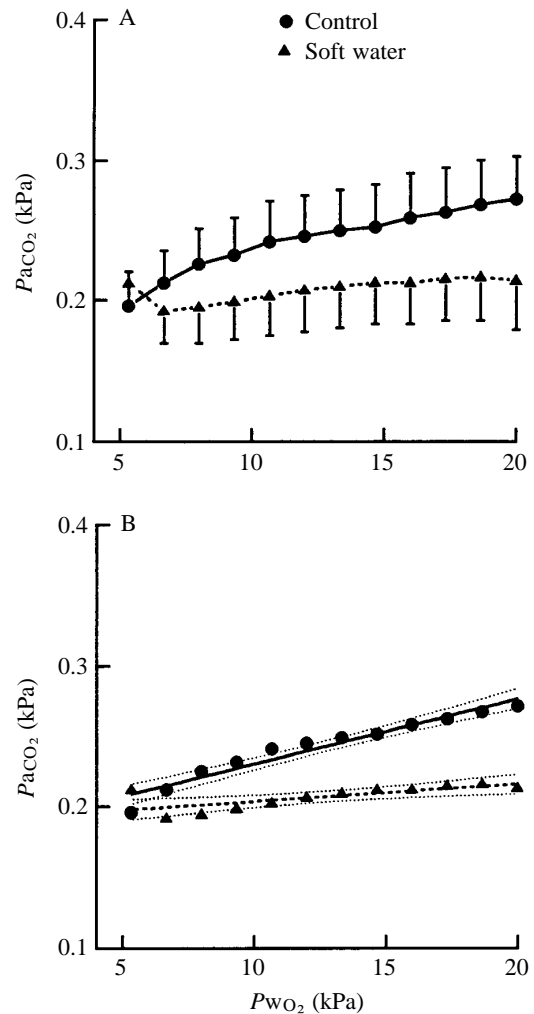

Fig. 5. (A) Effect of environmental hypoxia on arterial carbon dioxide partial pressure ( $P_{aCO_2}$ ) in control (solid line;  $N=7$ ) and softwater-acclimated rainbow trout (dashed line;  $N=8$ ). Error bars indicate 1 S.E.M. and are shown in only one direction for clarity. (B) Regression analysis showing the mean linear relationships between  $P_{aCO_2}$  and  $P_{wO_2}$  in control fish (slope= $0.005 \pm 0.001$  kPa  $P_{aCO_2}$  kPa $^{-1}$   $P_{wO_2}$ ) and softwater-exposed rainbow trout (slope= $0.002 \pm 0.001$  kPa  $P_{aCO_2}$  kPa $^{-1}$   $P_{wO_2}$ ). There is a significant difference ( $P < 0.06$ ) between the two groups in the slopes of the lines relating  $P_{aCO_2}$  and  $P_{wO_2}$ . 95% confidence limits are shown as dotted lines.

cortisol and/or growth hormone. On the basis of the positive correlations between gill chloride cell fractional surface area and the blood-to-water diffusion distance established previously in this laboratory (Bindon *et al.* 1994a; A. M. Greco, J. C. Fenwick and S. F. Perry, in preparation), it is reasonable to assume that the thickness of the diffusion barrier was increased markedly in the present experiments.

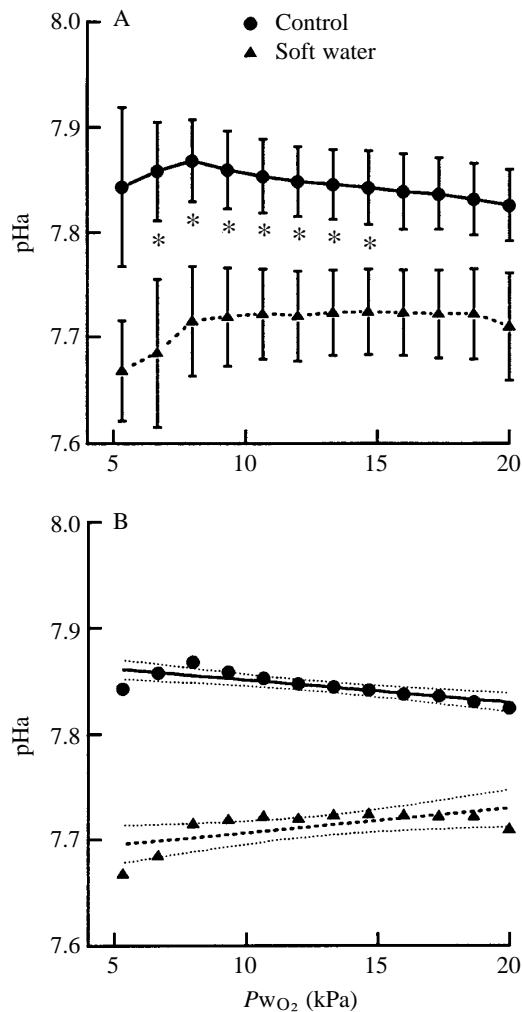

Fig. 6. (A) Effect of environmental hypoxia on arterial pH (pHa) in control (solid line;  $N=7$ ) and softwater-acclimated rainbow trout (dotted line;  $N=8$ ). \* indicates a significant difference ( $P<0.05$ ) between the treatment groups. Error bars indicate  $\pm 1$  S.E.M. (B) Regression analysis showing the mean linear relationships between pHa and  $PwO_2$  in the control fish (slope= $-0.0026 \pm 0.0025$  pH units  $kPa^{-1} PwO_2$ ) and softwater-acclimated fish (slope= $0.0021 \pm 0.0035$  pH units  $kPa^{-1} PwO_2$ ). 95% confidence limits are shown as dotted lines. The slopes did not differ.

#### Respiratory gas transfer during normoxia

A striking feature in the softwater-acclimated fish was the approximately 36% increase in ventilatory frequency. Given that the opercular displacement (a measure of ventilatory stroke volume) was unchanged, it is likely that the softwater-acclimated fish were experiencing marked hyperventilation. In theory, hyperventilation in the absence of other adjustments will increase the transbranchial diffusion gradients for  $O_2$  and  $CO_2$  (Wood and Perry, 1985) and thereby serve to elevate  $PaO_2$  and to lower  $PaCO_2$ . Thus, hyperventilation can be viewed as a compensatory mechanism to counteract the potential loss of gas transfer effectiveness associated with a thickened diffusion barrier. However, the consequences for  $O_2$  and  $CO_2$  transfer

are likely to differ. According to theoretical models (e.g. Malte and Weber, 1985),  $CO_2$  transfer across the fish gill is strongly diffusion-limited whereas  $O_2$  transfer is predominantly perfusion-limited (see also Daxboeck *et al.* 1982). Therefore, under normal conditions,  $CO_2$  transfer is expected to be more sensitive than  $O_2$  transfer to increases in the diffusion barrier thickness. Indeed, in the absence of an obvious hyperventilatory response as was noted in this study, Bindon *et al.* (1994b) observed a marked elevation of  $PaCO_2$  with no change in  $PaO_2$  in trout displaying a hormone-induced increase in the blood-to-water diffusion distance. Thus, in the present study, we speculate that the hyperventilation in the softwater-acclimated fish served to maintain  $CO_2$  excretion in the face of increased diffusion limitations imposed by the chloride cell proliferation. Given the absence or minimal contribution of diffusion limitations to  $O_2$  transfer under normoxic conditions (Daxboeck *et al.* 1982; Malte and Weber, 1985), it is perhaps surprising that  $PaO_2$  did not increase with increasing ventilation frequency. Two explanations are offered. First, the proliferation of chloride cells in the softwater-acclimated fish may have thickened the diffusion barrier to the extent that significant diffusion limitations were incurred for  $O_2$  transfer. Second, the localized consumption of  $O_2$  by the metabolically active chloride cells (Perry and Walsh, 1989) on the gill epithelial surfaces may have prevented the rise in  $PaO_2$ .

In softwater-acclimated fish, rates of  $O_2$  uptake and  $CO_2$  excretion were not significantly different from levels in the control fish. The apparent (not statistically significant) increase in  $O_2$  uptake rate in soft water was the result of very high values in three of the eight fish, with the other five fish displaying values essentially identical to the controls; this was also the cause of the high degree of variability in these data. Certainly there is no theoretical basis for an increased  $O_2$  uptake arising solely from hyperventilation under conditions of normoxia, except for the increased metabolic requirements of breathing itself (see below). Owing to the increased ventilation rate, it is reasonable to assume that the ventilatory convection requirement for  $CO_2$  excretion and  $O_2$  uptake were significantly increased in the softwater-acclimated fish.

Although the hyperventilatory response in softwater-acclimated fish should be viewed as a compensatory mechanism to aid  $CO_2$  excretion (and to a lesser extent  $O_2$  uptake), it will nevertheless increase the overall metabolic cost of breathing. There is considerable debate concerning the energetic requirements associated with breathing water (e.g. see Jones and Schwarzfeld, 1974), with estimated values ranging between 4 and 40% of overall metabolic rate. Regardless, it seems likely that a significant component of the overall metabolic rate in the softwater-acclimated fish was used to fuel the additional breathing movements. In addition, owing to the high metabolic activity of the chloride cell relative to that of the other cell types of the gill (Perry and Walsh, 1989), a component of the additional  $O_2$  uptake (as measured by disappearance of  $O_2$  from the water) may have reflected localized use by the more abundant, and potentially more metabolically active, chloride cells.



In contrast to the results of the present study, Bindon *et al.* (1994b) noted that the proliferation of chloride cells induced by cortisol and growth hormone treatment did not elicit an increase in breathing frequency or amplitude under normoxic conditions. While the absence of hyperventilation probably explains the increased  $P_{aCO_2}$  in the hormone-treated fish (Bindon *et al.* 1994b), the reasons for the discrepant effects of chloride cell proliferation on gill ventilation are unknown but may reflect the different protocols used to elicit chloride cell proliferation.

The lower bicarbonate concentration in the soft water (see Table 1) may also have contributed to the maintenance of  $CO_2$  excretion independently of ventilation adjustments. Adjacent to the gill epithelium is a micro-environment or boundary layer, the chemistry of which can vary markedly from that of the bulk water flowing over the gill (Playle and Wood, 1989; Randall *et al.* 1991). The excretion of  $CO_2$  acidifies the boundary layer (Wright *et al.* 1986) owing to the presence of carbonic anhydrase on the external surface of the gill (Rahim *et al.* 1988). The acidification of the boundary layer promotes  $CO_2$  excretion because the rapid hydration of  $CO_2$  to  $HCO_3^-$  and  $H^+$  lowers the  $P_{CO_2}$  of the boundary layer contributing to the maintenance of a favourable  $P_{CO_2}$  gradient across the gill. The reduced concentration of  $HCO_3^-$  in the soft water (see Table 1) would be expected to enhance the acidification process and thereby accelerate  $CO_2$  excretion.

The blood acid–base status of softwater fish was characterized by a metabolic acidosis superimposed upon a slight respiratory alkalosis. The metabolic acidosis may have arisen from differential effects of softwater acclimation on net  $Na^+$  and  $Cl^-$  fluxes across the gill. On the basis of a current model of branchial ion transfer in freshwater teleosts (e.g. Morgan *et al.* 1994), chloride cell proliferation might be expected to increase  $Cl^-$  uptake, *via*  $Cl^-/HCO_3^-$  exchange, without influencing  $Na^+$  uptake. Such a response would reduce branchial net acid excretion and thereby induce metabolic acidosis.

#### *Respiratory gas transfer during hypoxia*

During hypoxia, the water-to-blood  $O_2$  diffusion gradient is reduced and, consequently, the likelihood of diffusion limitations increases with decreasing water  $P_{O_2}$ . Furthermore, the hyperventilatory response known to accompany hypoxia (e.g. see review by Randall, 1982) lowers  $P_{aCO_2}$ . The extent of the reduction in  $P_{aCO_2}$  will vary according to the extent of the hyperventilation and the prevailing conditions for  $CO_2$  diffusion across the gill. Thus, hypoxia was used in the present study as a probe to investigate further possible diffusion limitations on gas transfer imposed by the proliferation of lamellar chloride cells. The results demonstrated that both  $O_2$  and  $CO_2$  transfers were impaired during hypoxia in the softwater-acclimated fish. In particular, the greater, more rapid decline of  $P_{aO_2}$  during progressive hypoxia in the softwater fish provided evidence of impaired  $O_2$  uptake and suggested a loss of  $O_2$  transfer effectiveness in these fish during hypoxia. This view was reinforced by graphically relating the

water–arterial blood  $P_{O_2}$  difference ( $P_{wO_2} - P_{aO_2}$ ) to  $P_{wO_2}$  (Fig. 4). Generally, during hypoxia the effectiveness of gas transfer increases owing to a variety of factors including hyperventilation and lamellar recruitment. Consequently, the difference between  $P_{wO_2}$  and  $P_{aO_2}$  is diminished. In the present study, the apparent  $O_2$  uptake effectiveness as estimated by  $P_{wO_2} - P_{aO_2}$  increased with the onset of hypoxia in both the control and softwater fish. As the severity of the hypoxia increased, however, two distinctly different patterns emerged. In the control fish, the apparent effectiveness continued to increase throughout most of the hypoxic period, whereas in the softwater fish, an obvious inflection was observed at 12 kPa  $P_{wO_2}$ , at which point the apparent effectiveness of  $O_2$  uptake began to decrease ( $P_{wO_2} - P_{aO_2}$  increased). The simplest explanation for these data is that diffusion limitations imposed by chloride cell proliferation became more evident as the diffusion gradient for  $O_2$  transfer was reduced during hypoxia. An additional explanation for the diminished ability of the softwater fish to maintain  $P_{aO_2}$  during hypoxia is their blunted hyperventilatory response (Figs 2, 3). Although ventilation volume was not measured directly, the absence of any changes in breathing frequency, coupled with an attenuated ventilatory amplitude response, indicates that ventilation volumes during hypoxia were reduced in the softwater fish in comparison with the control fish. The lack of a change in breathing frequency may simply have reflected the fact that breathing frequencies were already maximal (under this particular set of conditions) prior to hypoxia. Alternatively, the breathing frequency response to hypoxia may have been somehow otherwise modified by softwater exposure. In general, the ventilatory response of trout to hypoxia is variable, with some fish responding solely by changing stroke volume (Smith and Jones, 1982) whereas others alter both frequency and stroke volume (e.g. Davis and Cameron, 1971). The attenuated ventilation amplitude response in the softwater-acclimated fish in the present study may have been related to the high breathing frequency, as high frequencies are likely to constrain the amplitude of opercular displacement.

Unlike in the control fish,  $P_{aCO_2}$  remained constant during hypoxia in the softwater-acclimated fish. It seems likely that the effectiveness of  $CO_2$  transfer was already maximal prior to hypoxia and that further increases were precluded by the thickened diffusion barrier. It would have been informative to measure both  $CO_2$  excretion and  $O_2$  uptake rates during hypoxia at the lowest  $P_{wO_2}$  values (5.3 kPa). However, there are several problems associated with the closed system respirometry when used at such severe levels of hypoxia. In particular, a reduction in  $P_{wO_2}$  of only 0.5 kPa when the flow of water is stopped is often sufficient to promote struggling by the fish and the release of catecholamines into the circulation. At such times, the interpretation of  $O_2$  consumption and  $CO_2$  excretion data becomes problematic.

Thomas *et al.* (1988) compared the hypoxic responses of trout acclimated naturally to waters containing approximately 1.0 or 0.1 mmol l<sup>-1</sup> NaCl. In agreement with the present results, Thomas *et al.* (1988) reported that the fish acclimated

to ion-poor water were less resistant to hypoxia, and these authors attributed the difference to proliferation of lamellar chloride cells induced by the dilute environment. In apparent contrast with the results of the current study and other studies reporting impaired gas transfer (Bindon *et al.* 1994*b*) or a thickening of the diffusion barrier (Bindon *et al.* 1994*a*; A. M. Greco, J. C. Fenwick and S. F. Perry, in preparation) associated with chloride cell proliferation, Laurent and Hebib (1989) reported a reduction in the blood-to-water diffusion distance in trout exposed to soft water. Presently, we are unable to provide an explanation for the different results. Most of the available evidence supports the view that chloride cell proliferation, while presumably benefiting certain aspects of ionic regulation, may have detrimental consequences for respiratory gas transfer.

This study was made possible by support from the Natural Sciences and Engineering Council of Canada in the form of operating grants to J.C.F. and S.F.P.

### References

- AVELLA, M., MASONI, A., BORNANCIN, M. AND MAYER-GOSTAN, N. (1987). Gill morphology and sodium influx in the rainbow trout (*Salmo gairdneri*) acclimated to artificial freshwater environments. *J. exp. Zool.* **241**, 159–169.
- BINDON, S. D., FENWICK, J. C. AND PERRY, S. F. (1994*a*). Branchial chloride cell proliferation in the rainbow trout, *Oncorhynchus mykiss*: Implications for gas transfer. *Can. J. Zool.* **72**, 1395–1402.
- BINDON, S. D., GILMOUR, K. M., FENWICK, J. C. AND PERRY, S. F. (1994*b*). The effect of branchial chloride cell proliferation on gas transfer in the rainbow trout *Oncorhynchus mykiss*. *J. exp. Biol.* **197**, 47–63.
- BOUTILIER, R. G., HEMING, T. A. AND IWAMA, G. K. (1984). Physiochemical parameters for use in fish respiratory physiology. In *Fish Physiology*, vol. XA (ed. W. S. Hoar and D. J. Randall), pp. 403–430. Orlando: Academic Press.
- CAMERON, J. N. (1989). *The Respiratory Physiology of Animals*. Oxford: Oxford University Press. 353pp.
- DAVIS, J. C. AND CAMERON, J. N. (1971). Water flow and gas exchange at the gills of the rainbow trout, *Salmo gairdneri*. *J. exp. Biol.* **54**, 1–18.
- DAXBOECK, C., DAVIE, P. S., PERRY, S. F. AND RANDALL, D. J. (1982). Oxygen uptake in a spontaneously ventilating blood-perfused trout preparation. *J. exp. Biol.* **101**, 35–45.
- GARCIA-ROMEU, F. AND MASONI, A. (1970). Sur la mise en évidence des cellules à chlorure de la branchie des poissons. *Archs Anat. microsc.* **59**, 289–294.
- HOLETON, G. F. AND RANDALL, D. J. (1967). The effect of hypoxia upon the partial pressure of gases in the blood and water afferent and efferent to the gills of rainbow trout. *J. exp. Biol.* **46**, 317–327.
- JONES, D. R. AND SCHWARZFELD, T. (1974). The oxygen cost to the metabolism and efficiency of breathing in trout (*Salmo gairdneri*). *Respir. Physiol.* **21**, 241–253.
- LAURENT, P. L., DUNEL-ERB, S., CHEVALIER, C. AND LIGNON, J. (1994). Gill epithelial cell kinetics in a freshwater teleost, *Oncorhynchus mykiss* during adaptation to ion-poor water and hormonal treatments. *Fish Physiol. Biochem.* **13**, 353–370.
- LAURENT, P. L. AND HEBIBI, N. (1989). Gill morphometry and fish osmoregulation. *Can. J. Zool.* **67**, 3055–3063.
- LAURENT, P. L., HOBE, H. AND DUNEL-ERB, S. (1985). The role of environmental sodium chloride relative to calcium in gill morphology of freshwater salmonid fish. *Cell Tissue Res.* **259**, 429–442.
- LAURENT, P. L. AND PERRY, S. F. (1990). Effects of cortisol on gill chloride cell morphology and ionic uptake in the freshwater trout, *Salmo gairdneri*. *Cell Tissue Res.* **259**, 429–442.
- LAURENT, P. L. AND PERRY, S. F. (1991). Environmental effects on fish gill morphology. *Physiol. Zool.* **64**, 4–25.
- LEINO, R. L., MCCORMICK, J. H. AND JENSON, K. M. (1987). Changes in gill histology of fathead minnows and yellow perch transferred to soft water or acidified soft water with particular reference to chloride cells. *Cell Tissue Res.* **250**, 389–399.
- MALTE, H. AND WEBER, R. E. (1985). A mathematical model for gas exchange in the fish gill based on non-linear blood gas equilibrium curves. *Respir. Physiol.* **62**, 359–374.
- MARSHALL, W. S., BRYSON, S. E. AND WOOD, C. M. (1992). Calcium transport by isolated skin of rainbow trout. *J. exp. Biol.* **166**, 297–316.
- MCCORMICK, I. J., HASEGAWA, S. AND HIRANO, T. (1992). Calcium uptake in the skin of a freshwater teleost. *Proc. natn. Acad. Sci. U.S.A.* **89**, 3635–3638.
- MCDONALD, D. G. AND ROGANO, M. S. (1986). Ion regulation by the rainbow trout *Salmo gairdneri*, in ion-poor water. *Physiol. Zool.* **59**(3), 318–331.
- MORGAN, I. J., POTTS, W. T. W. AND OATES, K. (1994). Intracellular ion concentrations in branchial epithelial cells of brown trout (*Salmo trutta* L.) determined by X-ray microanalysis. *J. exp. Biol.* **194**, 139–151.
- PERRY, S. F. AND FLIK, G. (1988). Characterization of branchial transepithelial calcium fluxes in freshwater trout, *Salmo gairdneri*. *Am. J. Physiol.* **254**, 497–498.
- PERRY, S. F., GOSS, G. G. AND FENWICK, J. C. (1992*a*). Interrelationships between gill chloride cell morphology and calcium uptake in freshwater teleosts. *Fish Physiol. Biochem.* **10**, 327–337.
- PERRY, S. F., GOSS, G. G. AND LAURENT, P. L. (1992*b*). The interrelationships between gill chloride cell morphology and ionic uptake in four freshwater teleosts. *Can. J. Zool.* **70**, 1775–1786.
- PERRY, S. F. AND LAURENT, P. L. (1989). Adaptational responses of rainbow trout to lowered external NaCl concentration: contribution of the branchial chloride cell. *J. exp. Biol.* **147**, 147–168.
- PERRY, S. F. AND LAURENT, P. L. (1993). Environmental effects on fish gill structure and function. In *Fish Ecophysiology* (ed. J. C. Rankin and F. B. Jensen), pp. 231–264. London: Chapman & Hall.
- PERRY, S. F. AND WALSH, P. J. (1989). Metabolism of isolated fish gills: contribution of epithelial chloride cells. *J. exp. Biol.* **144**, 507–520.
- PERRY, S. F. AND WOOD, C. M. (1985). Kinetics of branchial calcium uptake in the rainbow trout: effects of acclimation to various external calcium levels. *J. exp. Biol.* **116**, 411–433.
- PLAYLE, R. C. AND WOOD, C. M. (1989). Water chemistry changes in the gill microenvironment of rainbow trout: Experimental observations and theory. *J. comp. Physiol. B* **159**, 527–537.
- RAHIM, S. M., DELAUNOY, J. P. AND LAURENT, P. L. (1988). Identification and immunocytochemical localization of 2 different carbonic anhydrase isozymes in teleostean fish erythrocytes and gill epithelia. *Histochemistry* **89**, 451–459.

- RANDALL, D. J. (1982). The control of respiration and circulation in fish during exercise and hypoxia. *J. exp. Biol.* **100**, 275–288.
- RANDALL, D. J. AND DAXBOECK, C. (1984). Oxygen and carbon dioxide transfer across fish gills. In *Fish Physiology*, vol. XA (ed. W. S. Hoar and D. J. Randall), pp. 263–314. Orlando: Academic Press.
- RANDALL, D. J., LIN, H. AND WRIGHT, P. A. (1991). Gill water flow and the chemistry of the boundary layer. *Physiol. Zool.* **64**, 28–38.
- SMITH, F. M. AND JONES, D. R. (1982). The effect of changes in blood oxygen carrying capacity on ventilation volume in the rainbow trout (*Salmo gairdneri*). *J. exp. Biol.* **97**, 325–334.
- SOIVIO, A., NYHOLM, K. AND WESTMAN, K. (1975). A technique for repeated blood sampling of the blood of individual resting fish. *J. exp. Biol.* **62**, 207–217.
- SPRY, D. J. AND WOOD, C. M. (1988). Zinc influx across the isolated, perfused head preparation of the rainbow trout (*Salmo gairdneri*) in hard and soft water. *Can. J. Fish. aquat. Sci.* **45**, 2206–2215.
- THOMAS, S., FIEVET, B., CLAIREAUX, G. AND MOTAIS, R. (1988). Adaptive respiratory responses of trout to acute hypoxia. I. Effects of water ionic composition on blood acid–base status and gill morphology. *Respir. Physiol.* **74**, 77–90.
- THOMAS, S. AND LERUZ, H. (1982). A continuous study of rapid changes in blood acid–base status during variations of water  $P_{CO_2}$ . *J. comp. Physiol. B* **148**, 123–130.
- TUCKER, V. A. (1967). Method for oxygen content and dissociation curves on microliter blood samples. *J. appl. Physiol.* **23**, 410–414.
- WOOD, C. M. AND PERRY, S. F. (1985). Respiratory, circulatory and metabolic adjustments to exercise in fish. In *Circulation, Respiration, Metabolism* (ed. R. Gilles), pp. 2–22. Berlin: Springer.
- WRIGHT, P., HEMING, T. AND RANDALL, D. J. (1986). Downstream pH changes in water flowing over the gills of rainbow trout. *J. exp. Biol.* **126**, 499–512.
- ZALL, D. M., FISHER, D. AND GARNER, M. Q. (1956). Photometric determination of chlorides in water. *Analyt. Chem.* **28**, 1665–1678.
